# Supplementary material for: High Dietary Histamine Induces Digestive Tract Oxidative Damage in Juvenile Striped Catfish (Pangasianodon hypophthalmus)
Source: MDPI journal article supplement (doi:10.3390/antiox11112276), 2022-11-17
Supplement: s1 [file s1]

Supplementary Material

**Table S1.** Intestinal digestive enzyme activities of striped catfish fed with different experimental diets.

| Item                | H0                          | H15                          | H30                         | H60                          | H120                        | H240                         | H480                        |
|---------------------|-----------------------------|------------------------------|-----------------------------|------------------------------|-----------------------------|------------------------------|-----------------------------|
| Pepsin (U/mg prot)  | 27.15 ± 3.49                | 26.52 ± 5.43                 | 26.91 ± 2.21                | 23.5 ± 5.57                  | 24.10 ± 1.97                | 20.08 ± 2.38                 | 21.77 ± 2.60                |
| Trypsin (U/mg prot) | 501.58 ± 1.02 <sup>b</sup>  | 499.64 ± 21.42 <sup>b</sup>  | 393.06 ± 47.09 <sup>a</sup> | 392.05 ± 12.03 <sup>a</sup>  | 337.86 ± 18.78 <sup>a</sup> | 378.41 ± 38.57 <sup>a</sup>  | 388.75 ± 24.97 <sup>a</sup> |
| Lipase (U/g prot)   | 123.28 ± 13.41 <sup>b</sup> | 113.86 ± 19.42 <sup>ab</sup> | 116.93 ± 1.58 <sup>ab</sup> | 99.71 ± 7.16 <sup>ab</sup>   | 101.4 ± 13.07 <sup>ab</sup> | 99.06 ± 11.68 <sup>ab</sup>  | 87.75 ± 3.62 <sup>a</sup>   |
| Amylase (U/mg prot) | 0.17 ± 0.03                 | 0.17 ± 0.04                  | 0.14 ± 0.02                 | 0.13 ± 0.01                  | 0.13 ± 0.01                 | 0.12 ± 0.01                  | 0.14 ± 0.01                 |
| Maltase U/mg prot   | 233.21 ± 18.27 <sup>c</sup> | 214.27 ± 36.30 <sup>c</sup>  | 203.94 ± 5.59 <sup>bc</sup> | 199.47 ± 10.22 <sup>bc</sup> | 192.19 ± 8.27 <sup>bc</sup> | 137.28 ± 21.62 <sup>ab</sup> | 107.94 ± 4.39 <sup>a</sup>  |

Data in the same row with different superscript letters indicate significant differences between groups ( $n = 3$ ;  $p < 0.05$ ).
